# Supplementary material for: Effect of Upregulation of Transcription Factor TFDP1 Binding Promoter Activity Due to RBP4 g.36491960G>C Mutation on the Proliferation of Goat Granulosa Cells
Source: MDPI journal article supplement (doi:10.3390/cells11142148), 2022-07-08
Supplement: s1 [file s1]

Table S1 PCR reaction procedure of SNP-KASP

| Temperature (°C) | Time (second) | Cycle                |
|------------------|---------------|----------------------|
| 94°C             | 15 min        | Hot-start activation |
| 94°C             | 20 s          | 10 cycles            |
| 61-55°C          | 60 s          |                      |
| 94°C             | 20 s          | 26 cycles            |
| 55°C             | 60 s          |                      |
