# Supplementary material for: Effect of Upregulation of Transcription Factor TFDP1 Binding Promoter Activity Due to RBP4 g.36491960G>C Mutation on the Proliferation of Goat Granulosa Cells
Source: MDPI journal article supplement (doi:10.3390/cells11142148), 2022-07-08
Supplement: s1 [file s1]

Table S2 Reaction system of SNP-KASP

| KASP typing reaction system                                 |                     |      |                     |      |
|-------------------------------------------------------------|---------------------|------|---------------------|------|
| (DNA diluted to final concentration of 5-50ng per reaction) |                     |      |                     |      |
| Components                                                  | Wet DNA method (μL) |      | Dry DNA method (μL) |      |
| DNA*                                                        | 2.5                 | 5    | -                   | -    |
| 2xMaster Mix                                                | 2.5                 | 5    | 2.5                 | 5    |
| Primer mix                                                  | 0.07                | 0.14 | 0.07                | 0.14 |
